# Supplementary material
Source: publisher figshare collection journal article supplement (https://sage.figshare.com/ndownloader/files/15084785)
Supplement: Supplementary file 1 [file 15084785]

**Appendix 3**

**Issue agendas for elections with immigration as “top” issue**

|  | Denmark 1998 | | Denmark 2001 | | Denmark 2005 | |
| --- | --- | --- | --- | --- | --- | --- |
| Stv/4.35+stv | 3.85/8.2 | | 3.84/8.2 | | 4.67/9.02 | |
|  |  | |  | |  | |
| 1 | ***Economy*** | ***14.4*** | ***Social*** | ***13.0*** | ***Social*** | ***17.5*** |
| 2 | ***Social*** | ***9.8*** | ***Immigration*** | ***12.1*** | ***Economy*** | ***12.4*** |
| 3 | ***Health*** | ***9.2*** | Health | 7.8 | ***Education*** | ***11.4*** |
| 4 | ***Education*** | ***8.7*** | Education | 7.8 | ***Immigration*** | ***10.1*** |
| *5* | Immigration | *8.1* | Foreign | 7.5 | Labour | 7.3 |
| *6* | Justice | *7.9* | Justice | 7.4 | Foreign | 7.0 |
| *7* | Environment | *6.6* | Labour | 6.6 | Environment | 6.7 |
| 8 | Labour | 5.1 | Economy | 6.6 | Health | 4.7 |
| 9 | Business | 4.8 | Environment | 6.5 | EU | 3.5 |
| 10 | EU | 4.1 | EU | 6.3 | Personal | 3.4 |
| 11 | Foreign | 4.0 | Agriculture | 3.1 | Justice | 3.2 |
| 12 | Defense | 3.8 | Transport | 3.0 | Government | 2.2 |
| 13 | Agriculture | 3.7 | Housing | 2.9 | Agriculture | 1.8 |
| 14 | Government | 2.2 | Personal | 2.3 | Buseness | 1.7 |
| 15 | Culture | 2.1 | Buseness | 1.7 | Regional | 1.6 |
| 16 | Personal | 1.7 | Defense | 1.5 | Defense | 1.3 |
| 17 | Housing | 1.3 | Energy | 1.2 | Technology | 1.3 |
| 18 | Transport | 1.3 | Culture | 0.9 | Energy | 1.2 |
| 19 | Politics | 0.7 | Technology | 0.7 | Housing | 1.0 |
| 20 | Regional | 0.3 | Government | 0.6 | Politics | 0.4 |
| 21 | Energy | 0.2 | Politics | 0.3 | Transport | 0.3 |
| 22 | Technology | 0.2 | Regional | 0.1 | Culture | 0.1 |
| 23 | Territories | 0.2 | Territories | 0.0 | Territories | 0.0 |

|  | Denmark 2007 | | Denmark 2011 | | Netherlands 2003 | |
| --- | --- | --- | --- | --- | --- | --- |
| Stv/4.35+stv | 4.83/9.18 | | 4.58/8.93 | | 3.36/7.71 | |
|  |  | |  | |  | |
| 1 | ***Immigration*** | ***16.6*** | ***Economy*** | ***16.6*** | ***Economy*** | ***13.6*** |
| 2 | ***Environment*** | ***13.3*** | ***Education*** | ***13.6*** | ***Justice*** | ***10.0*** |
| 3 | ***Social*** | ***12.2*** | ***Health*** | ***11.6*** | ***Politics*** | ***8.0*** |
| 4 | ***Economy*** | ***10.0*** | ***Immigration*** | ***9.9*** | Immigration | 7.4 |
| 5 | Education | 6.9 | Social | 7.0 | Health | 6.6 |
| 6 | Health | 6.7 | Labour | 6.8 | Social | 6.1 |
| 7 | Energy | 6.2 | Justice | 6.1 | Labour | 6.0 |
| 8 | Government | 5.7 | Environment | 4.4 | Government | 5.7 |
| 9 | EU | 5.5 | Foreign | 4.0 | Education | 5.2 |
| 10 | Foreign | 3.8 | Transport | 3.1 | Foreign | 5.1 |
| 11 | Justice | 3.0 | Personal | 2.4 | Environment | 4.7 |
| 12 | Personal | 2.1 | EU | 2.3 | Housing | 3.4 |
| 13 | Transport | 2.1 | Buseness | 2.0 | Agriculture | 3.2 |
| 14 | Agriculture | 1.9 | Government | 1.8 | Transport | 3.1 |
| 15 | Labour | 1.3 | Housing | 1.6 | Personal | 3.0 |
| 16 | Defense | 0.8 | Energy | 1.4 | Culture | 2.4 |
| 17 | Housing | 0.7 | Agriculture | 1.4 | EU | 2.0 |
| 18 | Buseness | 0.3 | Regional | 1.2 | Defense | 1.4 |
| 19 | Technology | 0.1 | Culture | 1.0 | Buseness | 1.1 |
| 20 | Regional | 0.1 | Technology | 0.9 | Energy | 1.1 |
| 21 | Politics | 0.0 | Defense | 0.5 | Technology | 0.4 |
| 22 | Territories | 0.0 | Politics | 0.4 | Territories | 0.3 |
| 23 | Culture | 0.0 | Territories | 0.0 | Regional | 0.2 |
